# Supplementary material for: Machine-learning-constrained projection of bivariate hydrological drought magnitudes and socioeconomic risks over China
Source: Copernicus journal article supplement (doi:10.5194/hess-28-3305-2024), 2024-07-25
Supplement: Supplementary file 1 [file hess-28-3305-2024-supplement.pdf]

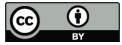

*Supplement of*

## **Machine-learning-constrained projection of bivariate hydrological drought magnitudes and socioeconomic risks over China**

**Rutong Liu et al.**

*Correspondence to:* Jiabo Yin ([jboyn@whu.edu.cn](mailto:jboyn@whu.edu.cn))

The copyright of individual parts of the supplement might differ from the article licence.

**Table S1. Classification of drought and threshold values of the drought events. Two drought indexes, TWSA-DSI and SRI, both follow this classification.**

| <b>Drought Classes</b> | <b>Drought Index (DI)</b> |
|------------------------|---------------------------|
| No Drought             | DI>-0.5                   |
| Mild Drought           | -1.0< DI≤-0.5             |
| Moderate Drought       | -1.5< DI≤-1.0             |
| Severe Drought         | -2.0< DI≤-1.5             |
| Extreme Drought        | DI≤-2.0                   |

**Table S2. Seven candidate distributions to the marginal distributions of drought duration and severity.**

| <b>Candidate distributions</b> | <b>Probability density functions</b>                                                                      |
|--------------------------------|-----------------------------------------------------------------------------------------------------------|
| Gamma                          | $f(x) = \frac{x^{\alpha-1}}{\beta^\alpha \Gamma(\alpha)} e^{-\frac{x}{\beta}}$                            |
| Generalized Extreme Value      | $f(x) = \exp\left\{-\left[1 + \gamma\left(\frac{x-\mu}{\sigma}\right)\right]^{-\frac{1}{\gamma}}\right\}$ |
| Inverse Gaussian               | $f(x) = \frac{\sqrt{\lambda}}{\sqrt{2\pi x^3}} \exp\left\{-\frac{\lambda(x-\mu)^2}{2\mu^2 x}\right\}$     |
| Log-normal                     | $f(x) = \frac{1}{x\sigma\sqrt{2\pi}} \exp\left\{-\frac{(\ln x - \mu)^2}{2\sigma^2}\right\}$               |
| Normal                         | $f(x) = \frac{1}{\sigma\sqrt{2\pi}} \exp\left\{-\frac{(x-\mu)^2}{2\sigma^2}\right\}$                      |
| Pearson type-III               | $f(x) = \frac{\beta^\alpha}{\Gamma(\alpha)} (x - a_0)^{\alpha-1} e^{-\beta(x-a_0)}$                       |
| Weibull                        | $f(x) = \frac{k}{\lambda} \left(\frac{x}{\lambda}\right)^{k-1} e^{-\left(\frac{x}{\lambda}\right)^k}$     |

**Table S3. Affiliation of acronyms and their full names in this study.**

|                | <b>Acronyms</b> | <b>Full names</b>                                        |
|----------------|-----------------|----------------------------------------------------------|
| <b>Drivers</b> | CMIP6           | Coupled Model Intercomparison<br>Project phase Six       |
|                | SSP             | Shared Socioeconomic Pathways                            |
|                | ISIMIP3b        | Intersectoral Impact Model Intercomparison<br>Project 3b |
|                | GCM             | Global Climate Model                                     |
|                | ECMWF           | European Center for Medium Weather<br>Forecasting        |

|                                                   |                       |                                                                     |
|---------------------------------------------------|-----------------------|---------------------------------------------------------------------|
|                                                   | ERA5                  | Fifth generation ECMWF Atmospheric Reanalysis of the global climate |
| <b>Meteorological variables</b>                   | <i>RH</i>             | Relative Humidity                                                   |
|                                                   | <i>SH</i>             | Specific Humidity                                                   |
|                                                   | <i>ps</i>             | Near surface air pressure                                           |
|                                                   | <i>pr</i>             | Precipitation                                                       |
|                                                   | <i>srsds</i>          | Surface Downwelling Shortwave Radiation                             |
|                                                   | <i>srlsds</i>         | Surface Downwelling Longwave Radiation                              |
|                                                   | <i>T<sub>2m</sub></i> | 2-meter Temperature                                                 |
|                                                   | <i>T<sub>d</sub></i>  | Dew-point Temperature                                               |
| <b>Hydrological models</b>                        | GR4J                  | Génie Rural à 4 paramètres Journalier                               |
|                                                   | HBV                   | Hydrologiska Byråns Vattenbalansavdelning                           |
|                                                   | HMETS                 | Hydrological Model of École de Technologie Supérieure               |
|                                                   | SIMHYD                | Simple lumped conceptual daily rainfall-runoff                      |
|                                                   | XAJ                   | Xinjiang                                                            |
| <b>Statistical &amp; Machine learning methods</b> | SCE-UA                | Shuffled Complex Evolution                                          |
|                                                   | BIC                   | Bayesian Information Criterion                                      |
|                                                   | MANOVA                | Multivariate Analysis of Variance                                   |
|                                                   | RNN                   | Recurrent Neural Network                                            |
|                                                   | LSTM                  | Long Short-Term Memory neural network                               |
|                                                   | RM                    | Random Forest                                                       |
|                                                   | HTM                   | Hybrid Terrestrial Model                                            |
| <b>Supporting test data</b>                       | GRACE                 | Gravity Recovery and Climate Experiment                             |
|                                                   | GRACE-FO              | GRACE Follow-On                                                     |
|                                                   | TWS                   | Terrestrial Water Storage                                           |
| <b>Statistical indicators</b>                     | KGE                   | Kling-Gupta Efficiency                                              |
|                                                   | JRP                   | Joint Return Period                                                 |
| <b>Drought indicators</b>                         | SRI                   | Standardized Runoff Index                                           |
|                                                   | TWS-DSI               | TWS based Drought Severity Index                                    |
